# Supplementary material for: Chiral random grain boundary phase of achiral hockey-stick liquid crystals
Source: Royal Society of Chemistry journal article supplement (doi:10.1039/c4sm01814a), 2014-01-01
Supplement: c4sm01814a1.pdf [file c4sm01814a1.pdf]

## Supporting Information for Chiral Random Grain Boundary Phase of Achiral Hockey-stick Liquid Crystals

Dong Chen<sup>a+</sup>, Haitao Wang<sup>b+</sup>, Min Li<sup>b\*</sup>, Matthew A. Glaser<sup>a</sup>,  
Joseph E. Maclennan<sup>a</sup> and Noel A. Clark<sup>a\*\*</sup>

<sup>a</sup>Department of Physics and Liquid Crystal Materials Research Center, University of Colorado,  
Boulder, CO 80309-0390.

<sup>b</sup>Key Laboratory of Automobile Materials (MOE) & College of Materials Science and  
Engineering, Jilin University, Changchun 130012, China.

<sup>+</sup>These authors contributed equally to this work

\*Email: [minli@jlu.edu.cn](mailto:minli@jlu.edu.cn)

\*\*Email: [noel.clark@colorado.edu](mailto:noel.clark@colorado.edu)

### Synthesis of 2-(4-cetyloxyphenyl)-5-biphenyl-1,3,4-oxadiazole (COBOXD)

COBOXD was derived by intramolecular dehydration cyclization of dihydrazide derivative, *N*-(4-cetyloxybenzoyl)-*N'*-(4'-biphenyl carbonyl) hydrazine (C16-Ph) [1], with POCl<sub>3</sub> under reflux condition (Scheme 1), and the coarse product was further purified by repeated recrystallization from ethanol for the <sup>1</sup>H NMR, FT-IR spectroscopic characterization and elemental analysis. <sup>1</sup>H NMR (500 MHz, CDCl<sub>3</sub>), (ppm, from TMS): 8.20 (d, 2H, J=8.3Hz); 8.09 (d, 2H, J=8.8Hz); 7.76 (d, 2H, J=8.4Hz); 7.66 (d, 2H, J=7.3Hz); 7.49 (t, 2H, J=7.6Hz); 7.41 (t, 1H, J=7.3Hz); 7.03 (d, 2H, J=8.8Hz); 4.04 (t, 2H, J=6.5Hz); 1.83 (m, 2H); 1.48 (m, 2H); 1.36 (m, 2H); 1.26 (m, 24H); 0.88 (t, 3H, J=6.9Hz). FT-IR (KBr disk, cm<sup>-1</sup>): 3089, 3059, 3040, 2954, 2918, 2849, 1616, 1586, 1498, 1483, 1472, 1449, 1409, 1573, 963, 1464, 1427, 1394, 1307, 1258, 1176, 1160, 1129, 1104, 1079, 1025, 963, 843, 823, 767, 740, 727, 720, 708, 697, 688. Anal. Calcd for C<sub>36</sub>H<sub>46</sub>N<sub>2</sub>O<sub>2</sub>: C, 80.26%; H, 8.61%; N, 5.20%. Found C, 80.47%; H, 8.73%; N, 5.47%. Yields >80%

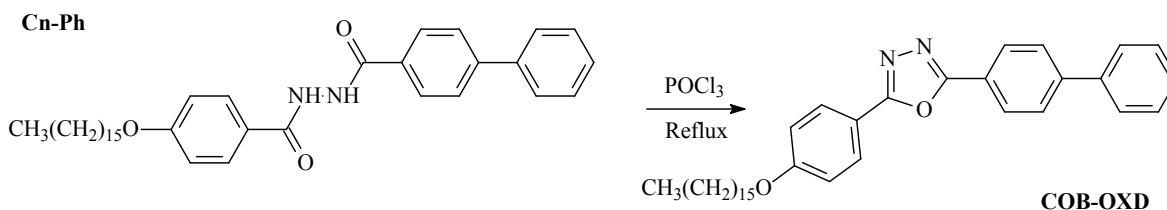

Scheme S.1: The synthesis route for COBOXD.

## Characterization methods

$^1\text{H}$  NMR spectra were recorded with a Bruker Avance 500MHz spectrometer, using  $\text{CDCl}_3$  as solvent and tetramethylsilane (TMS) as an internal standard. FT-IR spectra were recorded with a Perkin-Elmer spectrometer (Spectrum One B).

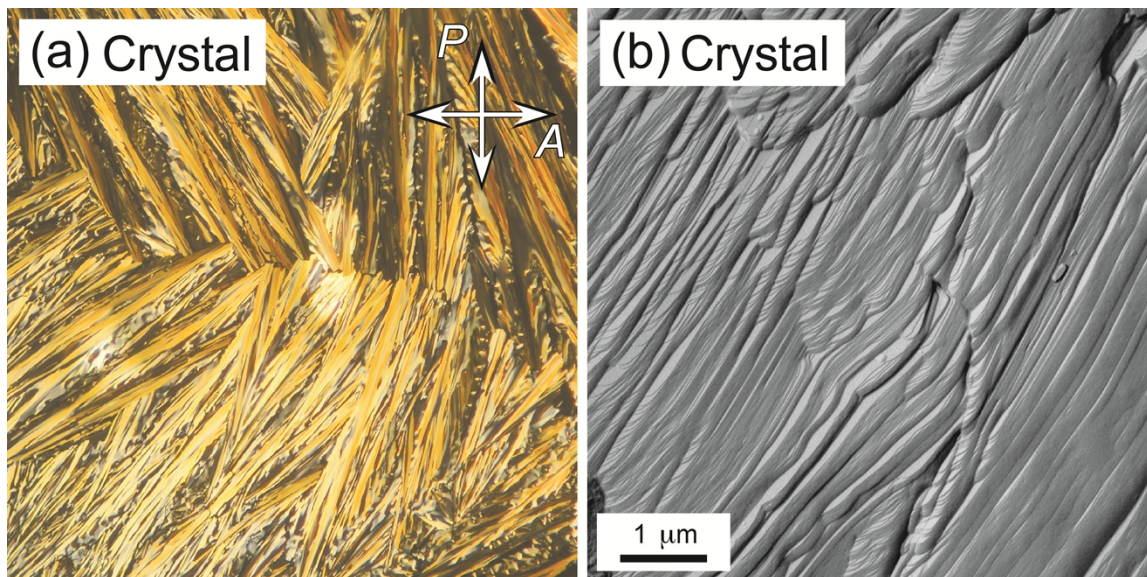

Figure S.1: The crystal phase of the achiral, hockey-stick molecule COBOXD. (a) Optical texture of the crystal phase showing birefringent domains. (b) Free-surface TEM image of the crystal phase at the air/liquid crystal interface, quenched at  $T=90^\circ\text{C}$ . In contrast to the RGB phase, the crystal phase shows a structure with long-range order.

## Reference

- [1] D. M. Pang, H. T. Wang, and M. Li, *Tetrahedron*, **61**, 6108-6114 (2005).
